# Supplementary material
Source: MDPI journal article supplement (https://www.mdpi.com/2071-1050/7/3/2490)
Supplement: s1 [file s1]

## Supplementary Materials

### 1. Place of Criteria in the Identification Key

Table 1 contains an overview of the criteria found in literature and a discussion per criteria in which domain of the sustainability assessment identification key they belong.

**Table S1.** Criteria found in literature on method selection and explanation on position in Identification Key.

| Criteria                                   | Explanation why in this domain                                                                                                                                                                                                                                                                                                                                                                                                                                                                                                                                                                                                            | References |
|--------------------------------------------|-------------------------------------------------------------------------------------------------------------------------------------------------------------------------------------------------------------------------------------------------------------------------------------------------------------------------------------------------------------------------------------------------------------------------------------------------------------------------------------------------------------------------------------------------------------------------------------------------------------------------------------------|------------|
| <i>Domain: System boundaries/Inventory</i> |                                                                                                                                                                                                                                                                                                                                                                                                                                                                                                                                                                                                                                           |            |
| Object                                     | Methods are often specialised for a specific type of object. Many methods are flexible in this sense, with adjustments they can be applied to other subjects. Still, we think the object is a leading criteria in method selection. The object determines the type of inventory that is required. It is not a key criteria for Impact assessment/Theme selection. For example, a theme like toxic pressure by the use of pesticides can be a relevant theme for any type of object: a product, a farm, agriculture as a sector and a region. The object is also not key for selection of the type of Aggregation/Interpretation required. | [1–6]      |
| Spatial focus of the activity              | Methods have clear restrictions in the spatial focus they are able to attend. Life cycle inventories focus on micro level, Cost Benefit Analysis (CBA) and input-output analyses on meso (organisation or sector) or macro level (economy wide), while risk assessment focusses on the local or regional level.                                                                                                                                                                                                                                                                                                                           | [1,3–7]    |
| Temporal focus of the assessment           | The temporal focus (retro-, present-, or prospective) determines the type of data, inventory, that is required. Many of the methods marked as retro- or present-spective by for example Ness <i>et al.</i> can be used in a prospective manner by using data from a scenario analysis instead of measurements from the past.                                                                                                                                                                                                                                                                                                              | [3,4,8–10] |
| Life cycle thinking                        | Although in principle, working from a life cycle thinking perspective is not exclusive for Life Cycle Analysis (LCA), Life Cycle Costing (LCC) or Social-LCA, but can be applied within any methodology, it asks a lot from modelling and database perspective, therefor we see this criteria as key for selection of a method. The form of life cycle thinking applied does depend on the object and spatial focus of the assessment. Life cycle assessments can be performed on products and processes. For assessments on organisations or regions chain analysis make more sense.                                                     | [6,11,12]  |

Table S1. Cont.

| Criteria                                         | Explanation why in this domain                                                                                                                                                                                                                                                                                                                                                                                                                                                                                                                                                                                             | References      |
|--------------------------------------------------|----------------------------------------------------------------------------------------------------------------------------------------------------------------------------------------------------------------------------------------------------------------------------------------------------------------------------------------------------------------------------------------------------------------------------------------------------------------------------------------------------------------------------------------------------------------------------------------------------------------------------|-----------------|
| <i>Domain: Impact Assessment/Theme selection</i> |                                                                                                                                                                                                                                                                                                                                                                                                                                                                                                                                                                                                                            |                 |
| What is to be sustained                          | The answer on the question what is to be sustained determines which themes are to be selected. Quantification of themes is not evenly developed for the different type of receptors (social, environmental, cultural, economic), in general there is more experience with quantification of environmental and economic indicators than with social and cultural indicators. Indirect, receptor focus can determine method selection via theme selection.                                                                                                                                                                   | [3,4,7,9,13,14] |
| Theme and indicator selection                    | Which themes are selected does have an influence on the choice of method, because not every theme can be quantified with every methodology. The match between theme selection and method selection is performed at the end of the identification key and is therefore not part of one of the sub identification keys. However, what is part of the identification key are characteristics of the themes: is the focus on impacts or pressures <i>etc.</i> ?                                                                                                                                                                | [2,5,6,13,15]   |
| Spatial focus of impact                          | The focus of impact assessments can be either object specific, within the boundaries of the location where the activity takes place, or it can be broader, taking also into account impacts elsewhere caused by the activities. For example, toxic substances emitted in a region can “travel” and thus cause effects outside that region. Furthermore, to determine impacts two approaches exist: site dependent or site-independent impact estimation. The first determines the impact based on the characteristics of a given location, the latter determines the impact independent of where the activity takes place. | [1,6,9,12,15]   |
| Temporal focus of the impact                     | To take into account impact on other generations is common practice for the environmental part of sustainability analysis. For example in some Life cycle impact assessment (LCIA) methods the characterisation factors with which pressures can be expressed as impacts depend on which cultural perspective is chosen, which come with a view on the temporal focus of the impacts (e.g., 20, 100 or 1000 years). The temporal focus of socio-economic impacts tend to be shorter than for environmental impacts.                                                                                                        | [7,9,10,14,16]  |
| <i>Domain: Aggregation/Interpretation</i>        |                                                                                                                                                                                                                                                                                                                                                                                                                                                                                                                                                                                                                            |                 |
| Sustainability target                            | Some method present the results intrinsically against a benchmark or sustainability target (e.g., ecological footprint), however in principle the results of every assessment can be held against sustainability targets.                                                                                                                                                                                                                                                                                                                                                                                                  | [8–10,12]       |

Table S1. Cont.

| Criteria                                   | Explanation why in this domain                                                                                                                                                                                                                                                                                                                                                                                                                                                                                                                                                                                                                                                                                                                                                                                                                                                                                                                                                                                                                 | References            |
|--------------------------------------------|------------------------------------------------------------------------------------------------------------------------------------------------------------------------------------------------------------------------------------------------------------------------------------------------------------------------------------------------------------------------------------------------------------------------------------------------------------------------------------------------------------------------------------------------------------------------------------------------------------------------------------------------------------------------------------------------------------------------------------------------------------------------------------------------------------------------------------------------------------------------------------------------------------------------------------------------------------------------------------------------------------------------------------------------|-----------------------|
| <i>Domain: Aggregation/Interpretation</i>  |                                                                                                                                                                                                                                                                                                                                                                                                                                                                                                                                                                                                                                                                                                                                                                                                                                                                                                                                                                                                                                                |                       |
| Values/View on sustainability              | <p>One's view on sustainability determines how results are interpreted. E.g., from weak sustainability point of view impacts on the different capitals are interchangeable: e.g., gaining economic capital by losing social capital can be seen as sustainable, as long as the total capital stays the same (or increases). While from strong sustainability point of view, impacts on the different capitals are not interchangeable: the loss of one capital cannot be justified by gaining other capital. Thus, depending on one's view on sustainability, different conclusions can be drawn based on the same results (same indicators and quantification). Also, one's world view, the way people perceive risks <i>etc.</i> determine how results are interpreted. Therefore, this criteria belongs to the domain aggregation and interpretation.</p> <p>NB: other elements that could be seen as "view on sustainability", e.g., "what should be sustained", are covered by other criteria.</p>                                        | [5,8,10,14,16–22]     |
| View on integration of pillars             | <p>Methodologies can be part of multi-, inter- or trans-disciplinary assessments. Multidisciplinary means that results from different disciplines are simultaneously presented; interdisciplinary means that results from different disciplines are aggregated somehow; and transdisciplinary means that assessments are mingled and thus asks for methodology tuning or even new methodology development. In the theme selection phase, the view on disciplinarity can be taken into account, e.g., by choosing indicators that refer to different disciplines, or indicators of interaction between phenomena within different disciplines. Also, the procedure to select themes can have different forms: with or without interaction between disciplines. Combining quantification methods from different disciplines, might need adjustment of these methods, e.g., to streamline the assumption like time horizon etcetera. Thus the type of integration determines how this step in aggregation is interwoven in the other domains.</p> | [4,9–11,14,16]        |
| Normalisation/weighting/aggregation method | <p>Evidently, the level of aggregation preferred determines the level of aggregation needed. The type of normalisation, weighting and aggregation is determined by the view on sustainability and perspective from which the assessment is performed, but also from the way indicators are quantified (e.g., if an arithmetic or geometric mean should be used).</p>                                                                                                                                                                                                                                                                                                                                                                                                                                                                                                                                                                                                                                                                           | [5–7,12–14,18]        |
| <i>Domain: Method Design</i>               |                                                                                                                                                                                                                                                                                                                                                                                                                                                                                                                                                                                                                                                                                                                                                                                                                                                                                                                                                                                                                                                |                       |
| View on stakeholder involvement            | <p>Participation of stakeholders can theoretically be imbedded in every assessment and thus method design.</p>                                                                                                                                                                                                                                                                                                                                                                                                                                                                                                                                                                                                                                                                                                                                                                                                                                                                                                                                 | [7,10,14,16,19,23,24] |

Table S1. Cont.

| Criteria                                   | Explanation why in this domain                                                                                                                                                                                                                                                                                                                                                                                                                                                                                                 | References       |
|--------------------------------------------|--------------------------------------------------------------------------------------------------------------------------------------------------------------------------------------------------------------------------------------------------------------------------------------------------------------------------------------------------------------------------------------------------------------------------------------------------------------------------------------------------------------------------------|------------------|
| Context of the assessment                  | The phase in a procedure for which an assessment is needed, and the accompanied goal of the assessment (decision making, advocacy, research, <i>etc.</i> ) determine how an assessment is performed and presented (quick scan or thoroughly examination; amount of details; <i>etc.</i> ). Like Hacking <i>et al.</i> [9] we argue that most methodologies are flexible enough to play a role within different contexts and thus this is no key criteria. It rather defines the method design and presentation of the results. | [1–3,7,23]       |
| Uncertainties                              | Uncertainty, sensitivity, perturbation assessments <i>etc.</i> can be added to any assessment.                                                                                                                                                                                                                                                                                                                                                                                                                                 | [1,7,9,10,14,25] |
| <i>Domain: Organisational restrictions</i> |                                                                                                                                                                                                                                                                                                                                                                                                                                                                                                                                |                  |
| Formal recognition                         | Some authors stipulate the importance for formal recognition of a methodology as a criteria for method selection. However, it is not yet clear what is and what is not formal recognition. E.g., is it important that it has an ISO standard, or is it important how much or by whom it is used? For now we exclude this criteria from the identification key.                                                                                                                                                                 | [1,7]            |
| Data requirements and availability         | Although taken up in the conceptual model of this paper, these boundary conditions are not yet operationalized. For now we focus of the best suitable methodology, without taking into account organisational restrictions.                                                                                                                                                                                                                                                                                                    | [1,7,12,26]      |
| Software requirements and availability     | Although taken up in the conceptual model of this paper, these boundary conditions are not yet operationalized. For now we focus of the best suitable methodology, without taking into account organisational restrictions.                                                                                                                                                                                                                                                                                                    | [1,5]            |
| Expertise requirements and availability    | Although taken up in the conceptual model of this paper, these boundary conditions are not yet operationalized. For now we focus of the best suitable methodology, without taking into account organisational restrictions.                                                                                                                                                                                                                                                                                                    | [1,5,14]         |

## 2. The Sustainability Assessment Identification Key

The first design of the sustainability assessment identification key for the domain “System Boundaries/Inventory” is provided as interactive pdf document as an example (Supporting Information part 2\_011214.pdf). The key is operationalized with a selection of methods (27 different methods).

### 3. List of the 30 Selected Case Studies

**Table S2.** Selection of case studies from literature.

| First Author | Year | Title                                                                                                                                                  | Reference |
|--------------|------|--------------------------------------------------------------------------------------------------------------------------------------------------------|-----------|
| Bausch       | 2014 | Agro-environmental sustainability assessment using multicriteria decision analysis and system analysis                                                 | [27]      |
| Cissé        | 2014 | Sustainability of tropical small-scale fisheries: Integrated assessment in French Guiana                                                               | [28]      |
| Dombi        | 2014 | Sustainability assessment of renewable power and heat generation technologies                                                                          | [29]      |
| Maxim        | 2014 | Sustainability assessment of electricity generation technologies using weighted multi-criteria analysis                                                | [30]      |
| Park         | 2014 | Quantitative Sustainability Assessment of Seaweed Biomass as Bioethanol Feedstock                                                                      | [31]      |
| Schernewski  | 2014 | Application and evaluation of an indicator set to measure and promote sustainable development in coastal areas                                         | [32]      |
| Brown        | 2013 | Sustainability assessment of renovation packages for increased energy efficiency for multi-family buildings in Sweden                                  | [33]      |
| Duarte       | 2013 | Sustainability assessment of sugarcane-ethanol production in Brazil: A case study of a sugarcane mill in São Paulo state                               | [34]      |
| Ibáñez-Forés | 2013 | Assessing the sustainability of Best Available Techniques (BAT): Methodology and application in the ceramic tiles industry                             | [35]      |
| LeCorre      | 2013 | Comparative Sustainability Assessment of Starch Nanocrystals                                                                                           | [36]      |
| Luthe        | 2013 | A systems approach to sustainable technical product design: Combining life cycle assessment and virtual development in the case of skis                | [37]      |
| Phillips     | 2013 | Determining the sustainability of options for municipal solid waste disposal in Varanasi, India.                                                       | [38]      |
| Riera Pérez  | 2013 | A multi-criteria approach to compare urban renewal scenarios for an existing neighborhood. Case study in Lausanne (Switzerland)                        | [39]      |
| Song         | 2013 | Sustainability evaluation of e-waste treatment based on emergy analysis and the LCA method: A case study of a trial project in Macau                   | [40]      |
| Binder       | 2012 | Sustainability solution space of the Swiss milk value added chain                                                                                      | [41]      |
| Castellani   | 2012 | Ecological Footprint and Life Cycle Assessment in the sustainability assessment of tourism activities                                                  | [42]      |
| Florin       | 2012 | Selecting the sharpest tools to explore the food-feed-fuel debate: Sustainability assessment of family farmers producing food, feed and fuel in Brazil | [43]      |
| Liu          | 2012 | Sustainability assessment of bioethanol and petroleum fuel production in Japan based on emergy analysis                                                | [44]      |
| Mata         | 2012 | LCA Tool for Sustainability Evaluations in the Pharmaceutical Industry                                                                                 | [45]      |
| Nzila        | 2012 | Multi criteria sustainability assessment of biogas production in Kenya                                                                                 | [46]      |

Table S2. Cont.

| First Author  | Year | Title                                                                                                                                                                                                                         | Reference            |
|---------------|------|-------------------------------------------------------------------------------------------------------------------------------------------------------------------------------------------------------------------------------|----------------------|
| Oudshoorn     | 2012 | Sustainability evaluation of automatic and conventional milking systems on organic dairy farms in Denmark                                                                                                                     | [47]                 |
| Silalertruksa | 2012 | Environmental sustainability assessment of palm biodiesel production in Thailand                                                                                                                                              | [48]                 |
| Stamford      | 2012 | Life cycle sustainability assessment of electricity options for the UK                                                                                                                                                        | [49]                 |
| Tatari        | 2012 | Comparative sustainability assessment of warm-mix asphalts: A thermodynamic based hybrid life cycle analysis                                                                                                                  | [50]                 |
| Tokos         | 2012 | An integrated sustainability performance assessment and benchmarking of breweries                                                                                                                                             | [51]                 |
| Traverso      | 2012 | Towards life cycle sustainability assessment: an implementation to photovoltaic modules                                                                                                                                       | [52]                 |
| Van Passel    | 2012 | Multilevel and multi-user sustainability assessment of farming systems                                                                                                                                                        | 2 case studies: [53] |
| Vermeulen     | 2012 | Sustainability assessment of industrial waste treatment processes: The case of automotive shredder residue                                                                                                                    | [54]                 |
| Corbire       | 2011 | Towards a global criteria based framework for the sustainability assessment of bioethanol supply chains Application to the Swiss dilemma: Is local produced bioethanol more sustainable than bioethanol imported from Brazil? | [55]                 |

## References

1. Wrisberg, N.; Udo de Haes, H.A.; Triebswetter, U.; Eder, P.; Clift, R. *Analytical Tools for Environmental Design and Management in a Systems Perspective*; Centre of Environmental Science, Leiden University: Leiden, The Netherlands, 2000.
2. Finnveden, G.; Moberg, A. Environmental systems analysis tools—An overview. *J. Cleaner Prod.* **2005**, *13*, 1165–1173.
3. Jeswani, H.K.; Azapagic, A.; Schepelmann, P.; Ritthoff, M. Options for broadening and deepening the lca approaches. *J. Cleaner Prod.* **2010**, *18*, 120–127.
4. Ness, B.; Urbel-Piirsalu, E.; Anderberg, S.; Olsson, L. Categorising tools for sustainability assessment. *Ecol. Econ.* **2007**, *60*, 498–508.
5. Singh, R.K.; Murty, H.R.; Gupta, S.K.; Dikshit, A.K. An overview of sustainability assessment methodologies. *Ecol. Indic.* **2012**, *15*, 281–299.
6. Udo de Haes, H.A.; Sleeswijk, A.W.; Heijungs, R. Similarities, differences and synergisms between hera and lca—An analysis at three levels. *Hum. Ecol. Risk Assess.* **2006**, *12*, 431–449.
7. Parris, T.M.; Kates, R.W. Characterizing and Measuring Sustainable Development. *Annu. Rev. Env. Resour.* **2003**, *28*, 559–586.
8. Pope, J.; Annandale, D.; Morrison-Saunders, A. Conceptualising sustainability assessment. *Environ. Impact Assess. Rev.* **2004**, *24*, 595–616.

9. Hacking, T.; Guthrie, P. A framework for clarifying the meaning of triple bottom-line, integrated, and sustainability assessment. *Environ. Impact Assess. Rev.* **2008**, *28*, 73–89.
10. Gasparatos, A.; Scolobig, A. Choosing the most appropriate sustainability assessment tool. *Ecol. Econ.* **2012**, *80*, 1–7.
11. Sala, S.; Farioli, F.; Zamagni, A. Progress in sustainability science: Lessons learnt from current methodologies for sustainability assessment: Part 1. *Int. J. Life Cycle Assess.* **2013**, *18*, 1653–1672.
12. Mayer, A.L. Strengths and weaknesses of common sustainability indices for multidimensional systems. *Environ. Int.* **2008**, *34*, 277–291.
13. Böhringer, C.; Jochem, P.E.P. Measuring the immeasurable—A survey of sustainability indices. *Ecol. Econ.* **2007**, *63*, 1–8.
14. Gasparatos, A.; El-Haram, M.; Horner, M. A critical review of reductionist approaches for assessing the progress towards sustainability. *Environ. Impact Assess. Rev.* **2008**, *28*, 286–311.
15. Joumard, R. Environmental sustainability assessments: Towards a new framework. *Int. J. Sustain. Soc.* **2011**, *3*, 133–150.
16. Bond, A.J.; Morrison-Saunders, A. Re-evaluating sustainability assessment: Aligning the vision and the practice. *Environ. Impact Assess. Rev.* **2011**, *31*, 1–7.
17. Dietz, S.; Neumayer, E. Weak and strong sustainability in the sea: Concepts and measurement. *Ecol. Econ.* **2007**, *61*, 617–626.
18. Özdemir, E.D.; Härdtlein, M.; Jenssen, T.; Zech, D.; Eltrop, L. A confusion of tongues or the art of aggregating indicators—Reflections on four projective methodologies on sustainability measurement. *Renew. Sustain. Energy Rev.* **2011**, *15*, 2385–2396.
19. Robèrt, K.H.; Schmidt-Bleek, B.; Aloisi De Larderel, J.; Basile, G.; Jansen, J.L.; Kuehr, R.; Price Thomas, P.; Suzuki, M.; Hawken, P.; Wackernagel, M. Strategic sustainable development—Selection, design and synergies of applied tools. *J. Cleaner Prod.* **2002**, *10*, 197–214.
20. Svarstad, H.; Petersen, L.K.; Rothman, D.; Siepel, H.; Wätzold, F. Discursive biases of the environmental research framework dpsir. *Land Use Policy* **2008**, *25*, 116–125.
21. De Schryver, A.M.; van Zelm, R.; Humbert, S.; Pfister, S.; McKone, T.E.; Huijbregts, M.A.J. Value choices in life cycle impact assessment of stressors causing human health damage. *J. Ind. Ecol.* **2011**, *15*, 796–815.
22. Zoeteman, K. Sustainability of nations. Tracing stages of sustainable development of nations with integrated indicators. *Int. J. Sustain. Dev. World Ecol.* **2001**, *8*, 93–109.
23. De Ridder, W.; Turnpenny, J.; Nilsson, M.; von Raggamby, A. A framework for tool selection and use in integrated assessment for sustainable development. *J. Environ. Assess. Policy Manag.* **2007**, *9*, 423–441.
24. Thabrew, L.; Wiek, A.; Ries, R. Environmental decision making in multi-stakeholder contexts: Applicability of life cycle thinking in development planning and implementation. *J. Cleaner Prod.* **2009**, *17*, 67–76.
25. Pintér, L.; Hardi, P.; Martinuzzi, A.; Hall, J. Bellagio stamp: Principles for sustainability assessment and measurement. *Ecol. Indic.* **2012**, *17*, 20–28.
26. Olsen, S.I.; Christensen, F.M.; Hauschild, M.; Pedersen, F.; Larsen, H.F.; Tørsløv, J. Life cycle impact assessment and risk assessment of chemicals—A methodological comparison. *Environ. Impact Assess. Rev.* **2001**, *21*, 385–404.

27. Bausch, J.C.; Bojórquez-Tapia, L.; Eakin, H. Agro-environmental sustainability assessment using multicriteria decision analysis and system analysis. *Sustain. Sci.* **2014**, *9*, 303–319.
28. Cissé, A.A.; Blanchard, F.; Guyader, O. Sustainability of tropical small-scale fisheries: Integrated assessment in French Guiana. *Mar. Policy* **2014**, *44*, 397–405.
29. Dombi, M.; Kuti, I.; Balogh, P. Sustainability assessment of renewable power and heat generation technologies. *Energy Policy* **2014**, *67*, 264–271.
30. Maxim, A. Sustainability assessment of electricity generation technologies using weighted multi-criteria decision analysis. *Energy Policy* **2014**, *65*, 284–297.
31. Park, H.R.; Jung, K.A.; Lim, S.R.; Park, J.M. Quantitative sustainability assessment of seaweed biomass as bioethanol feedstock. *Bioenergy Res.* **2014**, *7*, 974–985.
32. Schernewski, G.; Schönwald, S.; Katarżyte, M. Application and evaluation of an indicator set to measure and promote sustainable development in coastal areas. *Ocean Coast. Manag.* **2014**, *101*, 2–13.
33. Brown, N.W.O.; Malmqvist, T.; Bai, W.; Molinari, M. Sustainability assessment of renovation packages for increased energy efficiency for multi-family buildings in Sweden. *Build. Sci.* **2013**, *61*, 140–148.
34. Duarte, C.G.; Gaudreau, K.; Gibson, R.B.; Malheiros, T.F. Sustainability assessment of sugarcane-ethanol production in Brazil: A case study of a sugarcane mill in São Paulo state. *Ecol. Indic.* **2013**, *30*, 119–129.
35. Ibáñez-Forés, V.; Bovea, M.D.; Azapagic, A. Assessing the sustainability of best available techniques (BAT): Methodology and application in the ceramic tiles industry. *J. Cleaner Prod.* **2013**, *51*, 162–176.
36. LeCorre, D.; Hohenthal, C.; Dufresne, A.; Bras, J. Comparative sustainability assessment of starch nanocrystals. *J. Polym. Environ.* **2013**, *21*, 71–80.
37. Luthe, T.; Kägi, T.; Reger, J. A systems approach to sustainable technical product design: Combining life cycle assessment and virtual development in the case of skis. *J. Ind. Ecol.* **2013**, *17*, 605–617.
38. Phillips, J.; Mondal, M.K. Determining the sustainability of options for municipal solid waste disposal in Varanasi, India. *Sustain. Cities Soc.* **2013**, *10*, 11–21.
39. Riera Pérez, M.G.; Rey, E. A multi-criteria approach to compare urban renewal scenarios for an existing neighborhood. Case study in Lausanne (Switzerland). *Build. Sci.* **2013**, *65*, 58–70.
40. Song, Q.; Wang, Z.; Li, J. Sustainability evaluation of e-waste treatment based on emergy analysis and the LCA method: A case study of a trial project in Macau. *Ecol. Indic.* **2013**, *30*, 138–147.
41. Binder, C.R.; Schmid, A.; Steinberger, J.K. Sustainability solution space of the Swiss milk value added chain. *Ecol. Econ.* **2012**, *83*, 210–220.
42. Castellani, V.; Sala, S. Ecological footprint and life cycle assessment in the sustainability assessment of tourism activities. *Ecol. Indic.* **2012**, *16*, 135–147.
43. Florin, M.J.; van Ittersum, M.K.; van de Ven, G.W.J. Selecting the sharpest tools to explore the food-feed-fuel debate: Sustainability assessment of family farmers producing food, feed and fuel in Brazil. *Ecol. Indic.* **2012**, *20*, 108–120.
44. Liu, J.; Lin, B.L.; Sagisaka, M. Sustainability assessment of bioethanol and petroleum fuel production in Japan based on emergy analysis. *Energy Policy* **2012**, *44*, 23–33.



45. Mata, T.M.; Martins, A.A.; Neto, B.; Martins, M.L.; Salcedo, R.L.R.; Costa, C.A.V. Lca tool for sustainability evaluations in the pharmaceutical industry. *Mech. Chem. Eng. Trans.* **2012**, *26*, 261–266.
46. Nzila, C.; Dewulf, J.; Spanjers, H.; Tuigong, D.; Kiriamiti, H.; van Langenhove, H. Multi criteria sustainability assessment of biogas production in Kenya. *Appl. Energy* **2012**, *93*, 496–506.
47. Oudshoorn, F.W.; Kristensen, T.; van der Zijpp, A.J.; Boer, I.J.M.D. Sustainability evaluation of automatic and conventional milking systems on organic dairy farms in Denmark. *NJAS Wagening. J. Life Sci.* **2012**, *59*, 25–33.
48. Silalertruksa, T.; Gheewala, S.H. Environmental sustainability assessment of palm biodiesel production in Thailand. *Energy* **2012**, *43*, 306–314.
49. Stamford, L.; Azapagic, A. Life cycle sustainability assessment of electricity options for the UK. *Int. J. Energy Res.* **2012**, *36*, 1263–1290.
50. Tatari, O.; Nazzal, M.; Kucukvar, M. Comparative sustainability assessment of warm-mix asphalts: A thermodynamic based hybrid life cycle analysis. *Resour. Conserv. Recycl.* **2012**, *58*, 18–24.
51. Tokos, H.; Pintarič, Z.N.; Krajnc, D. An integrated sustainability performance assessment and benchmarking of breweries. *Clean Technol. Environ. Policy* **2012**, *14*, 173–193.
52. Traverso, M.; Asdrubali, F.; Francia, A.; Finkbeiner, M. Towards life cycle sustainability assessment: An implementation to photovoltaic modules. *Int. J. Life Cycle Assess.* **2012**, *17*, 1068–1079.
53. Van Passel, S.; Meul, M. Multilevel and multi-user sustainability assessment of farming systems. *Environ. Impact Assess. Rev.* **2012**, *32*, 170–180.
54. Vermeulen, I.; Block, C.; van Caneghem, J.; Dewulf, W.; Sikdar, S.K.; Vandecasteele, C. Sustainability assessment of industrial waste treatment processes: The case of automotive shredder residue. *Resour. Conserv. Recycl.* **2012**, *69*, 17–28.
55. Corbière-Nicollier, T.; Blanc, I.; Erkman, S. Towards a global criteria based framework for the sustainability assessment of bioethanol supply chains: Application to the Swiss dilemma: Is local produced bioethanol more sustainable than bioethanol imported from Brazil? *Ecol. Indic.* **2011**, *11*, 1447–1458.
